# Supplementary material for: Intellectual disability-associated factor Zbtb11 cooperates with NRF-2/GABP to control mitochondrial function
Source: PubMed Central journal article supplement (PMC7596099; doi:10.1038/s41467-020-19205-x), 2020-10-29
Supplement: 41467_2020_19205_MOESM4_ESM.pdf [file 41467_2020_19205_MOESM4_ESM.pdf]

## Reporting Summary

Nature Research wishes to improve the reproducibility of the work that we publish. This form provides structure for consistency and transparency in reporting. For further information on Nature Research policies, see [Authors & Referees](#) and the [Editorial Policy Checklist](#).

### Statistics

For all statistical analyses, confirm that the following items are present in the figure legend, table legend, main text, or Methods section.

n/a Confirmed

- The exact sample size ( $n$ ) for each experimental group/condition, given as a discrete number and unit of measurement
- A statement on whether measurements were taken from distinct samples or whether the same sample was measured repeatedly
- The statistical test(s) used AND whether they are one- or two-sided  
*Only common tests should be described solely by name; describe more complex techniques in the Methods section.*
- A description of all covariates tested
- A description of any assumptions or corrections, such as tests of normality and adjustment for multiple comparisons
- A full description of the statistical parameters including central tendency (e.g. means) or other basic estimates (e.g. regression coefficient) AND variation (e.g. standard deviation) or associated estimates of uncertainty (e.g. confidence intervals)
- For null hypothesis testing, the test statistic (e.g.  $F$ ,  $t$ ,  $r$ ) with confidence intervals, effect sizes, degrees of freedom and  $P$  value noted  
*Give  $P$  values as exact values whenever suitable.*
- For Bayesian analysis, information on the choice of priors and Markov chain Monte Carlo settings
- For hierarchical and complex designs, identification of the appropriate level for tests and full reporting of outcomes
- Estimates of effect sizes (e.g. Cohen's  $d$ , Pearson's  $r$ ), indicating how they were calculated

*Our web collection on [statistics for biologists](#) contains articles on many of the points above.*

### Software and code

Policy information about [availability of computer code](#)

Data collection

Oxygen concentrations/consumption was collected on a Seahorse XF24 running XFReader (version 1.8.1.1)  
qPCR data was collected using a StepOne Plus system (Applied Biosystems) running StepOne Software (version 2.3)  
Protein concentration measurements were collected using a plate reader running SkanIt Software (version 5.0)

Data analysis

RNA-seq reads were aligned using STAR (version 2.5.1a)  
Differential gene expression analysis was performed in R using the Bioconductor package edgeR (version 3.24.0)  
ChIP-seq reads were trimmed and filtered using Trim Galore!(Cutadapt) (version 0.4.3), and duplicates removed with Picard (version 2.6.0). Filtered reads were aligned using Bowtie (version 1.1.2).  
Chip-seq peaks were called using MACS2 (version 2.1.0) and consensus peaksets were obtained using the Irreproducibility Discovery Rate pipeline (version 2012) as described: <https://sites.google.com/site/anshulkundaje/projects/idr/deprecated>  
Overlap analysis of genomic regions was performed using the R Bioconductor packages GenomicRanges (version 1.36.1) and GenomicFeatures (version 1.36.4). Normalised read coverage values for consensus peaks were obtained using the DiffBind Bioconductor package (version 2.12.0).  
Specific genomic sequences were obtained using the Bioconductor package BSgenome (version 1.52.0).

For manuscripts utilizing custom algorithms or software that are central to the research but not yet described in published literature, software must be made available to editors/reviewers. We strongly encourage code deposition in a community repository (e.g. GitHub). See the Nature Research [guidelines for submitting code & software](#) for further information.

## Data

Policy information about [availability of data](#)

All manuscripts must include a [data availability statement](#). This statement should provide the following information, where applicable:

- Accession codes, unique identifiers, or web links for publicly available datasets
- A list of figures that have associated raw data
- A description of any restrictions on data availability

The datasets generated during the current study are available in the GEO repository, accession number GSE125047, <https://www.ncbi.nlm.nih.gov/geo/query/acc.cgi?acc=GSE125047>

Figures with associated raw data: Fig.1, Fig.3, Supplementary Fig. 1

## Field-specific reporting

Please select the one below that is the best fit for your research. If you are not sure, read the appropriate sections before making your selection.

Life sciences  Behavioural & social sciences  Ecological, evolutionary & environmental sciences

For a reference copy of the document with all sections, see [nature.com/documents/nr-reporting-summary-flat.pdf](https://www.nature.com/documents/nr-reporting-summary-flat.pdf)

## Life sciences study design

All studies must disclose on these points even when the disclosure is negative.

Sample size

The aim of this study was to identify the molecular and cellular roles of Zbtb11. We used a genetic approach to delete the Zbtb11 gene and given that very little is known about this transcription factor, we were interested in identifying the most striking phenotypes. We were therefore interested in relatively large effect sizes (> 2-fold changes between control and KO). Given we have carried out the assays before, we knew the expected signal to noise ratio. This allowed us to conduct power calculations to estimate sample sizes that provide 80% chance of detecting a significant 2-fold difference between control and Zbtb11 KO when a p-value cutoff of 0.05 is applied. The formula used to determine expected signal to noise ratio is  $(\text{signal/noise ratio}) = (\text{Mean KO} - \text{Mean Control}) / \text{standard deviation}$ . Tables providing necessary sample sizes for discrete values of signal/noise ratios and power are widely available in statistical books. An example: [http://www.3rs-reduction.co.uk/html/6\\_\\_power\\_and\\_sample\\_size.html](http://www.3rs-reduction.co.uk/html/6__power_and_sample_size.html)  
We do however recognise there are limitations in applying null hypothesis significance testing, especially where sample sizes are small, and that p-values are better considered as continuous values. For this reason we provide in the figures actual p-values rather than designations of significance.

Data exclusions

One RNA-seq biological replicate was excluded from the differential gene expression (DGE) analysis, based on the results of multi-dimensional scaling (MDS) analysis which showed that one replicate was considerably different from the other two. The full justification for this and a comparison of the results with and without the excluded replicate are included in the Methods section and Supplementary Fig. 7

Replication

As much as possible we tried to validate our findings by using more than one approach to measure differences between control and Zbtb11 KO samples. For example, RNA-seq results were validated by performing RT-qPCR on independent samples. Similarly, binding of Zbtb11 to the chromatin was investigated by ChIP-seq as well as ChIP-qPCR. Importantly, the binding of Zbtb11 to the chromatin was determined using antibodies to the endogenous protein as well as FLAG antibodies in a cell line expressing FLAG-Zbtb11, obtaining highly correlated datasets.

Randomization

We obtained control and Zbtb11 KO samples by splitting the same culture in two and applying either ethanol (carrier) or 4-hydroxytamoxifen (4OHT) treatment, so there should be no confounding covariates. The effect of 4OHT alone was controlled for by including 4OHT-treated Zbtb11 WT cells in the experimental design.

Blinding

Where possible, samples were collected and analysed by different researchers. Due to limitations on staff working on the same project this was not always possible.

## Reporting for specific materials, systems and methods

We require information from authors about some types of materials, experimental systems and methods used in many studies. Here, indicate whether each material, system or method listed is relevant to your study. If you are not sure if a list item applies to your research, read the appropriate section before selecting a response.

## Materials &amp; experimental systems

| n/a                                 | Involved in the study                                     |
|-------------------------------------|-----------------------------------------------------------|
| <input type="checkbox"/>            | <input checked="" type="checkbox"/> Antibodies            |
| <input type="checkbox"/>            | <input checked="" type="checkbox"/> Eukaryotic cell lines |
| <input checked="" type="checkbox"/> | <input type="checkbox"/> Palaeontology                    |
| <input checked="" type="checkbox"/> | <input type="checkbox"/> Animals and other organisms      |
| <input checked="" type="checkbox"/> | <input type="checkbox"/> Human research participants      |
| <input checked="" type="checkbox"/> | <input type="checkbox"/> Clinical data                    |

## Methods

| n/a                                 | Involved in the study                              |
|-------------------------------------|----------------------------------------------------|
| <input type="checkbox"/>            | <input checked="" type="checkbox"/> ChIP-seq       |
| <input type="checkbox"/>            | <input checked="" type="checkbox"/> Flow cytometry |
| <input checked="" type="checkbox"/> | <input type="checkbox"/> MRI-based neuroimaging    |

## Antibodies

## Antibodies used

FLAG M2 (F3165, Sigma)  
 Zbtb11 (NBP1-80327, Bio-Techne)  
 GABPa (sc-28312 X, Santa Cruz)  
 NRF1 (D9K6P) (46743S, Cell Signalling Technologies)  
 Patz1 (sc-292109, Santa Cruz)  
 Lamin B (sc-6216, Santa Cruz)  
 Mrpl48 (14677-1-AP, Proteintech)  
 Ndufc2 (15573-1-AP, Proteintech)  
 Ndufb11 (ab183716, Abcam)  
 Ndufa9 (ab14713, Abcam)  
 Mtco1, Ndufb8, Sdhb, Uqcrc2, and Atp5a are part of an OXPHOS antibody cocktail (ab110413, Abcam)  
 Mtco1 (ab14705, Abcam)  
 HRP-coupled anti-mouse (P026002-2, Dako)  
 HRP-coupled anti-rabbit (A16029, Thermo Fisher Scientific)  
 HRP-coupled anti-goat (SAB3700285, Sigma)  
 Alexa Fluor 647-conjugated anti-cleaved Caspase-3 (9602, Cell Signaling Technology)

## Validation

Zbtb11 (NBP1-80327, Bio-Techne) and Patz1 (sc-292109, Santa Cruz) were validated by loss of signal in the respective KO cells (see Figures 2b and Supplementary Figure 2b).  
 Zbtb11 (NBP1-80327, Bio-Techne) ChIP-seq signal also correlated very well with FLAG-Zbtb11 ChIP-seq (See Figure 1c and Supplementary Figure 1c).

The rest of the antibodies were extensively characterised in the literature by immunoblot:  
 FLAG M2 (F3165, Sigma) - The Journal of biological chemistry, 279(53), 55697-55706 (2004), Jean-Christophe Peter et. al.  
 GABPa (sc-28312 X, Santa Cruz) - Cell Stem Cell. 23: 193-209.e5. , 2018, Yu, B. et al.  
 Patz1 (sc-292109, Santa Cruz) - Molecular and Cellular Biology, 2015, Keskin, N., Deniz, E., et al.  
 NRF1 (D9K6P) (46743S, Cell Signalling Technologies) - Cell Discovery, 2018, Liao, C. Y., Anderson, S. S., et al.  
 Mrpl48 (14677-1-AP, Proteintech) - Nucleic Acids Research, 2013, Surovtseva, Y. V. & Shadel, G. S..  
 Ndufc2 (15573-1-AP, Proteintech) - Scientific Reports, 2017, Fu, L., Xu, Y., et al.  
 Ndufb11 (ab183716, Abcam) - Clinical Genetics, 2018, Baertling, F., Sánchez-Caballero, L., et al.  
 Ndufa9 (ab14713, Abcam) - Cell Research, 2019, Rao, S., Mondragón, L., et al.  
 Mtco1, Ndufb8, Sdhb, Uqcrc2, and Atp5a are part of an OXPHOS antibody cocktail (ab110413, Abcam) - Nat Commun 9:1875 (2018), Lin H et al.  
 Mtco1 (ab14705, Abcam) - Nature, 2018, Frattini, V., Pagnotta, S. M., et al.  
 HRP-coupled anti-mouse (P026002-2, Dako) - Neuron. 2017;94(4):809-825.e7., Tortosa E et al  
 HRP-coupled anti-rabbit (A16029, Thermo Fisher Scientific) - Nature Neuroscience, 2015, Zhao, Z., Sagare, A. P., et al.  
 HRP-coupled anti-goat (SAB3700285, Sigma) - Scientific reports, 9(1), 2019, Anna Georges et. al  
 Alexa Fluor 647-conjugated anti-cleaved Caspase-3 (9602, Cell Signaling Technology) - Cell, 2017, Moretti, J., Roy, S., et al.

## Eukaryotic cell lines

## Policy information about cell lines

## Cell line source(s)

Gift from the transgenics core facility (MRC London Institute of Medical Sciences): wild type E14 mouse ES cells.  
 Oakey Lab (King's College London): HEK293

## Authentication

E14 mouse ES cells: Expression of pluripotency markers Oct4, Nanog, Sox2. Microscopy - colony formation and morphology.  
 HEK293: Microscopy - morphology

## Mycoplasma contamination

All cells tested negative for Mycoplasma

Commonly misidentified lines  
(See ICLAC register)

No commonly misidentified cell lines were used in this study

## Data deposition

- Confirm that both raw and final processed data have been deposited in a public database such as [GEO](#).
- Confirm that you have deposited or provided access to graph files (e.g. BED files) for the called peaks.

## Data access links

May remain private before publication.

<https://www.ncbi.nlm.nih.gov/geo/query/acc.cgi?acc=GSE125047>

## Files in database submission

FLAG-Zbtb11\_peaks.bed  
 FLAG\_Control\_peaks.bed  
 Zbtb11\_peaks.bed  
 Zbtb11\_consensus\_peaks\_read\_coverage.txt  
 FLAG-Zbtb11\_ChIPSeq\_Rep1.bw.gz  
 FLAG-Zbtb11\_ChIPSeq\_Rep2.bw.gz  
 FLAG-Zbtb11\_ChIPSeq\_Rep3.bw.gz  
 FLAG\_Control\_ChIPSeq\_Rep1.bw.gz  
 FLAG\_Control\_ChIPSeq\_Rep2.bw.gz  
 Zbtb11\_ChIPSeq\_Rep1.bw.gz  
 Zbtb11\_ChIPSeq\_Rep2.bw.gz  
 Zbtb11\_ChIPSeq\_Rep3.bw.gz  
 Zbtb11\_ChIPSeq\_Rep4.bw.gz  
 Input\_FLAG-Zbtb11\_Rep1.bw.gz  
 Input\_FLAG-Zbtb11\_Rep2.bw.gz  
 Input\_Zbtb11\_Rep1.bw.gz  
 Input\_Zbtb11\_Rep2.bw.gz  
 Input\_Zbtb11\_Rep3.bw.gz  
 FLAG-Zbtb11\_ChIPSeq\_Rep1.fastq.gz  
 FLAG-Zbtb11\_ChIPSeq\_Rep2.fastq.gz  
 FLAG-Zbtb11\_ChIPSeq\_Rep3.fastq.gz  
 FLAG\_Control\_ChIPSeq\_Rep1.fastq.gz  
 FLAG\_Control\_ChIPSeq\_Rep2.fastq.gz  
 Zbtb11\_ChIPSeq\_Rep1.fastq.gz  
 Zbtb11\_ChIPSeq\_Rep2.fastq.gz  
 Zbtb11\_ChIPSeq\_Rep3.fastq.gz  
 Zbtb11\_ChIPSeq\_Rep4.fastq.gz  
 Input\_FLAG-Zbtb11\_Rep1.fastq.gz  
 Input\_FLAG-Zbtb11\_Rep2.fastq.gz  
 Input\_Zbtb11\_Rep1.fastq.gz  
 Input\_Zbtb11\_Rep2.fastq.gz  
 Input\_Zbtb11\_Rep3.fastq.gz

## Genome browser session

(e.g. [UCSC](#))

[https://genome.ucsc.edu/s/Vladseitan/WilsonB\\_SeitanVC\\_Jan2020](https://genome.ucsc.edu/s/Vladseitan/WilsonB_SeitanVC_Jan2020)

## Methodology

## Replicates

Zbtb11\_ChIPSeq 4 biological replicates Pairwise correlation coefficients: 0.8, 0.83, 0.77, 0.81, 0.78, 0.8  
 FLAG-Zbtb11\_ChIPSeq 3 biological replicates Pairwise correlation coefficients: 0.83, 0.82, 0.77  
 FLAG\_Control\_ChIPSeq 2 biological replicates Pairwise correlation coefficients: N/A (control samples)

## Sequencing depth

| SAMPLE                    | TOTAL READS | UNIQUELY MAPPED READS |
|---------------------------|-------------|-----------------------|
| FLAG-Zbtb11_ChIPSeq_Rep1  | 162,113,122 | 107,834,690           |
| FLAG-Zbtb11_ChIPSeq_Rep2  | 111,185,522 | 76,050,172            |
| FLAG-Zbtb11_ChIPSeq_Rep3  | 34,637,440  | 23,839,146            |
| FLAG_Control_ChIPSeq_Rep1 | 138,627,144 | 91,697,962            |
| FLAG_Control_ChIPSeq_Rep2 | 73,286,570  | 49,200,154            |
| Zbtb11_ChIPSeq_Rep1       | 91,510,697  | 63,113,855            |
| Zbtb11_ChIPSeq_Rep2       | 94,100,548  | 62,993,772            |
| Zbtb11_ChIPSeq_Rep3       | 31,320,381  | 22,260,708            |
| Zbtb11_ChIPSeq_Rep4       | 32,833,640  | 23,107,422            |

## Antibodies

FLAG M2 (F3165, Sigma)  
 Zbtb11 (NBP1-80327, Bio-Techne)

## Peak calling parameters

Read mapping (Bowtie [1.1.2]): bowtie -p 4 -S -v 2 -m 1  
 Reads were aligned to mm9

Peak calling (MACS2 [2.1.0]) - part of the Irreproducibility Discovery Rate (IDR) pipeline which requires calling > 100,000 peaks with a relaxed threshold of p-value 0.05 or 0.1 (macs2 callpeak -p 0.05) in order to provide a suitable background for

the IDR calculations. The IDR threshold used was 0.02 and the final set of peaks was the conservative peakset. For peak calling PCR/optical duplicates were removed, and peaks were called relative to control (input) samples.

## Data quality

We used an Irreproducibility Discovery Rate (IDR) threshold of 0.02 (conservative peakset). This approach has been used by the ENCODE consortium processing pipeline and is described in detail: <https://sites.google.com/site/anshulkundaje/projects/idr/deprecated>

| SAMPLE                                  | NUMBER OF PEAKS |
|-----------------------------------------|-----------------|
| Zbtb11_ChIPSeq (IDR 4 replicates)       | 8,957           |
| FLAG-Zbtb11_ChIPSeq (IDR 3 replicates)  | 9,350           |
| FLAG_Control_ChIPSeq (IDR 2 replicates) | 327             |
| Consensus Zbtb11/FLAG-Zbtb11            | 7,500           |

## Software

Peaksets determined by IDR (BED) and alignment files (BAM) were imported in R using the Bioconductor package DiffBind and normalised read coverage values were obtained for each peak. Peaks were annotated using the Bioconductor package TxDb.Mmusculus.UCSC.mm9.knownGene

## Flow Cytometry

### Plots

Confirm that:

- The axis labels state the marker and fluorochrome used (e.g. CD4-FITC).
- The axis scales are clearly visible. Include numbers along axes only for bottom left plot of group (a 'group' is an analysis of identical markers).
- All plots are contour plots with outliers or pseudocolor plots.
- A numerical value for number of cells or percentage (with statistics) is provided.

### Methodology

## Sample preparation

ES cells were fixed in 70% ethanol and stained with propidium iodide for cell cycle analysis  
For cell GFP-based sorting, cells were trypsinised, washed in PBS and resuspended in PBS supplemented with fetal bovine serum and DAPI to discriminate dead cells

## Instrument

BD LSRFortessa for analysis  
BD FACSAria for cell sorting

## Software

BS FACSDiva

## Cell population abundance

The sort target for each experiment was set at 100,000 cells per sample. Samples were always sorted sequentially on the same machine and using identical settings for all samples in one experiment. Purity was determined by analysing a small fraction of cells from the sorted samples using the same cytometer used for the sort.

## Gating strategy

Cell debris were gated out on a SSC-A/FSC-A plot, doublets were then removed on a SSC-A/SSC-W plot, and live cells were selected on a Pacific Blue-A/FSC-A plot by gating out DAPI-positive cells. Gated live cells were then visualised on a PE-A/FITC-A plot in order to discriminate true GFP-positive cells from autofluorescence.

- Tick this box to confirm that a figure exemplifying the gating strategy is provided in the Supplementary Information.
